# Supplementary material for: Low Dose of Direct Oral Anticoagulants after Left Atrial Appendage Occlusion
Source: MDPI journal article supplement (doi:10.3390/jcdd8110142), 2021-10-28

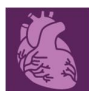

Table S1. Clinical outcomes 12-months follow-up.

| Clinical Outcome                | Total<br>(n = 132) | No antithrombotic<br>Treatment<br>(n = 6) | Single<br>Antiplatelet<br>(n = 75) | Dual Antiplatelet<br>(n = 39) | Apixaban<br>2.5mg/12 h<br>(n = 12) | p Value |
|---------------------------------|--------------------|-------------------------------------------|------------------------------------|-------------------------------|------------------------------------|---------|
| Ischemic stroke                 | 1 (1)              | 0                                         | 1 (1)                              | 0                             | 0                                  | 0.33    |
| Systemic Embolization           | 0                  | 0                                         | 0                                  | 0                             | 0                                  | NA      |
| Device related thrombus         | 5 (4)              | 1 (16)                                    | 0                                  | 2 (5)                         | 0                                  | 0.02    |
| Any Bleeding (major +<br>minor) | 9 (7)              | 0                                         | 4 (5)                              | 5 (13)                        | 1 (8)                              | 0.53    |
| Major bleeding (BARC $\geq 3$ ) | 5 (4)              | 0                                         | 2 (3)                              | 3 (8)                         | 0                                  | 0.65    |
| All-cause mortality             | 6 (4)              | 0                                         | 4 (6)                              | 2 (5)                         | 0                                  | 0.73    |

Values are n (%) or mean  $\pm$  SD.

Figure S1. Antithrombotic treatment after three-months follow-up.

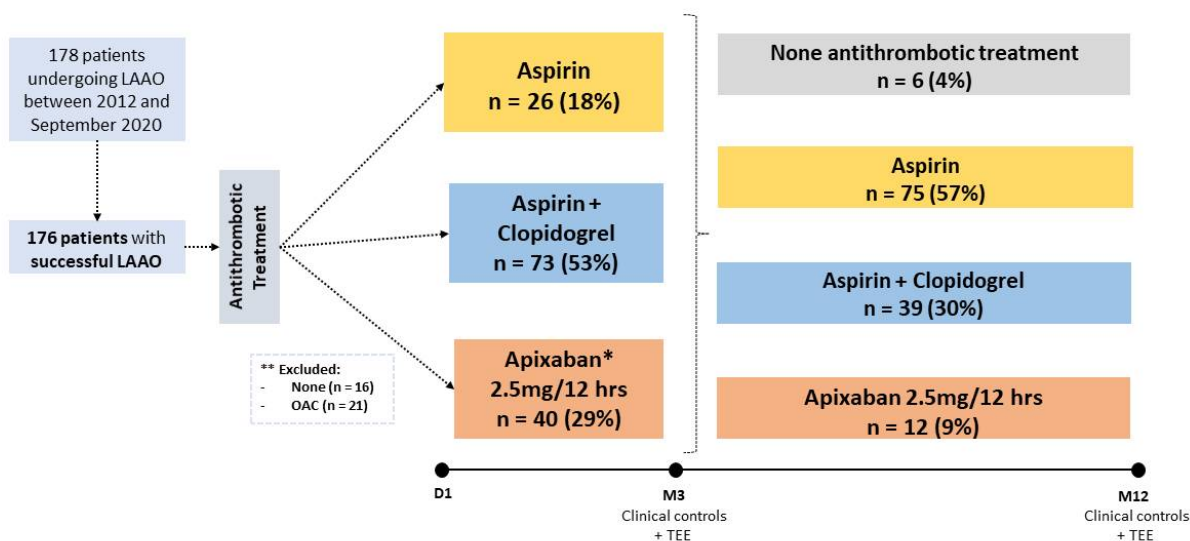

Supplement: s1 [file s1]
